# Supplementary material
Source: PubMed Central journal article supplement (PMC423292)
Supplement: 7600253s1.pdf [file 7600253s1.pdf]

## Supplemental data 1

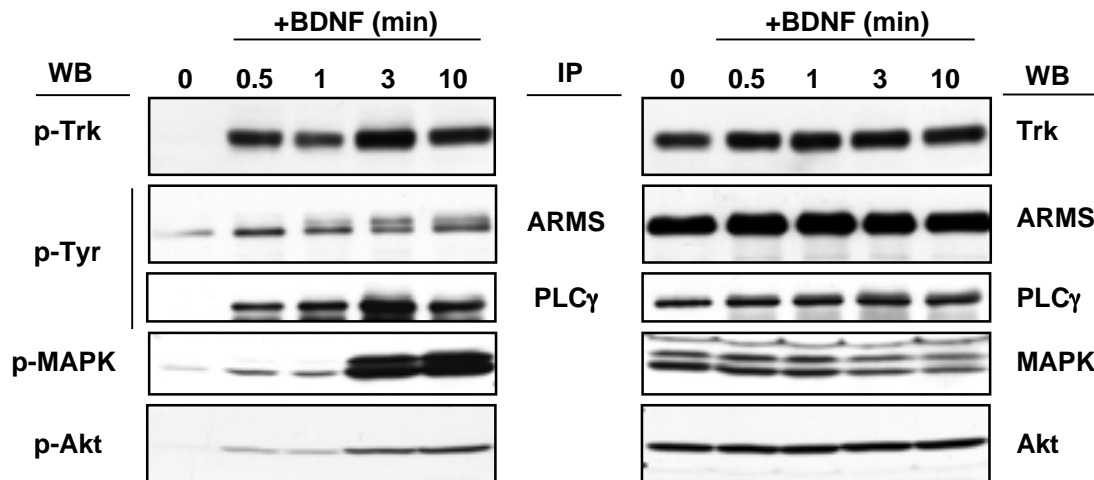

**Figure S1. Phosphorylation time course of TrkB, ARMS, PLC- $\gamma$ , MAPK and Akt proteins upon BDNF treatment in primary cortical neurons.** Cortical neurons (8-10 DIV) were starved for 4-6 hours and BDNF (50 ng/ml) were added for the indicated time (minutes). Immunoprecipitation was carried out to detect tyrosine phosphorylation of ARMS, PLC- $\gamma$  and 50  $\mu$ g of whole lysates were used for Trk, MAPK and Akt detection (left panel). The same blot was re-probed with Trk, ARMS, PLC- $\gamma$ , MAPK and Akt antibodies to verify the amount of protein loaded in each lane (right panel).

## Supplemental data 2

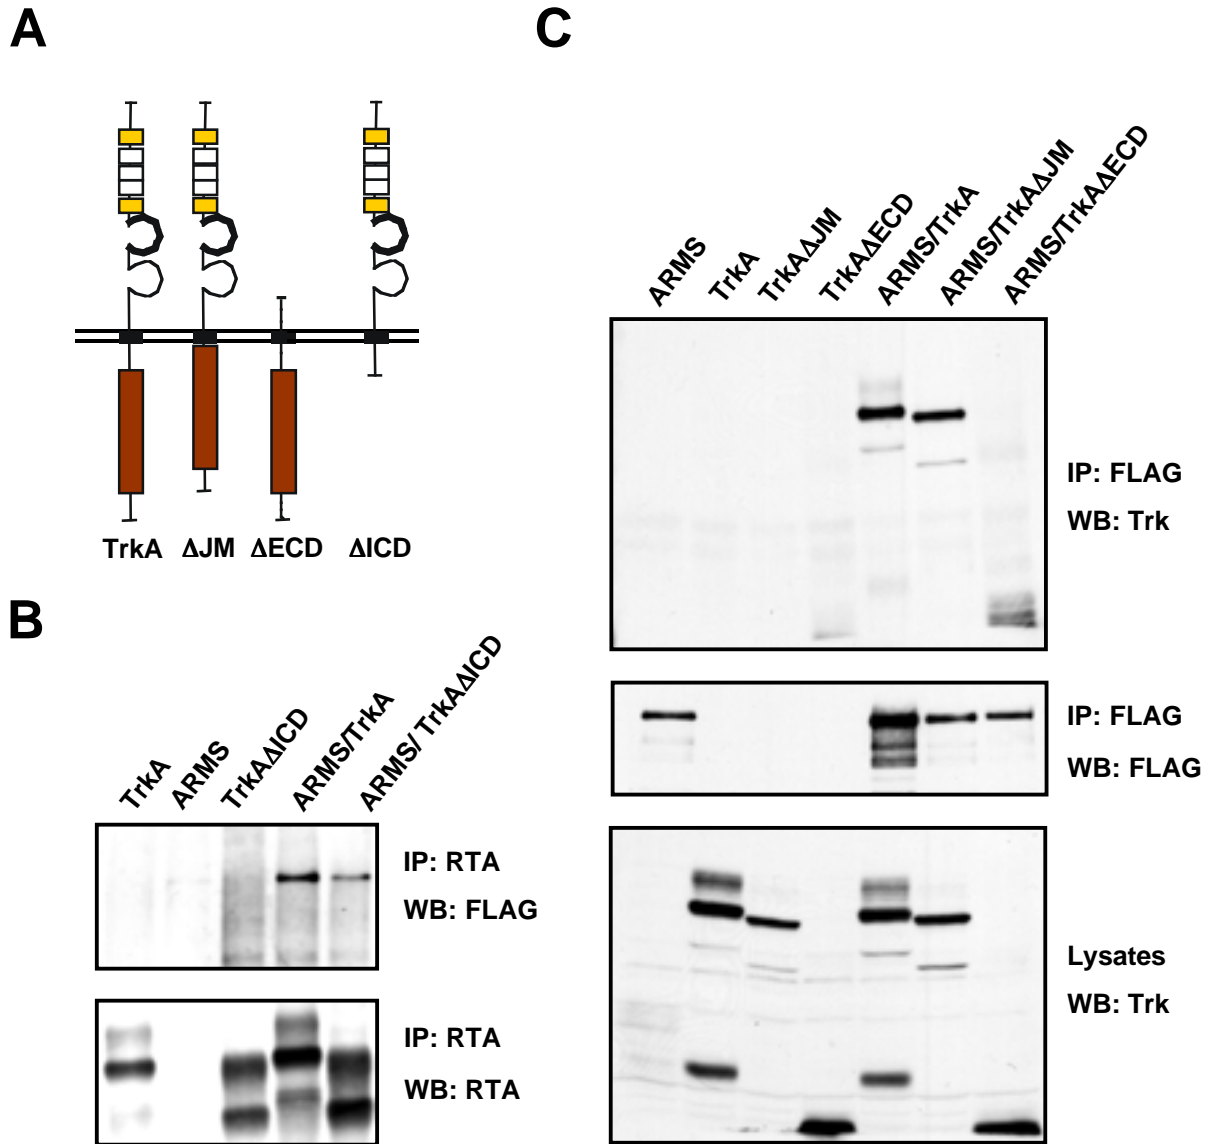

**Figure S2. Deletion of extracellular, intracellular or juxtamembrane region of TrkA does not abolish the interaction with ARMS.**

(A) TrkA receptor deletions. The regions deleted were the juxtamembrane ( $\Delta$ JM), extracellular ( $\Delta$ ECD) or intracellular ( $\Delta$ ICD) domain.

(B) Deletion of intracellular ( $\Delta$ ICD) region of TrkA did not abolish association with ARMS. Anti-RTA immunoprecipitation was performed with extracts from HEK293 cells transfected with FLAG-ARMS and wild type TrkA or TrkA $\Delta$ ICD. The presence of ARMS was verified by Western blotting with an anti-FLAG antibody.

(C) Deletion of extracellular ( $\Delta$ ECD) or juxtamembrane ( $\Delta$ JM) region of TrkA did not abolish association with ARMS. Anti-FLAG immunoprecipitation experiments were performed with extracts from HEK293 cells transfected with FLAG-tagged full length ARMS and wild type or truncated TrkA receptors, followed by Western blotting with an anti-Trk antisera.

## Supplemental data 3

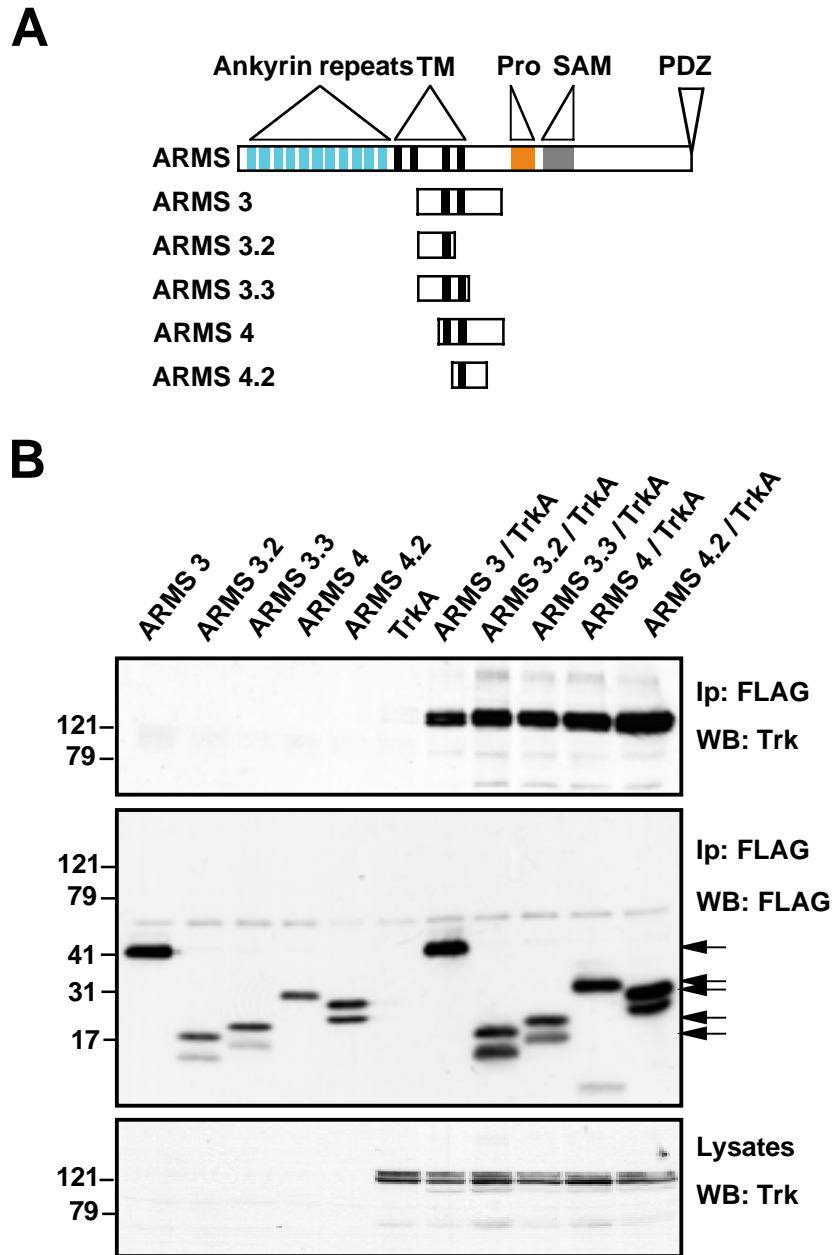

**Figure S3. ARMS transmembrane domains are responsible for the interaction with Trk receptors.**

(A) Deletion constructs containing 3<sup>rd</sup> and/or 4<sup>th</sup> transmembrane domains of ARMS.

(B) Transmembrane regions of ARMS are involved in the interaction with TrkA. Anti-FLAG immunoprecipitation was performed with extracts from HEK293 cells transfected with FLAG-ARMS mutants and wild type TrkA. The presence of Trk was verified by Western blotting with an anti-Trk antisera.
